# Supplementary material for: Segmental dynamics, morphology and thermomechanical properties of electrospun poly(ε-caprolactone) nanofibers in the presence of an interacting filler
Source: Royal Society of Chemistry journal article supplement (doi:10.1039/c5ra24251g), 2016-01-01
Supplement: c5ra24251g1.pdf [file c5ra24251g1.pdf]

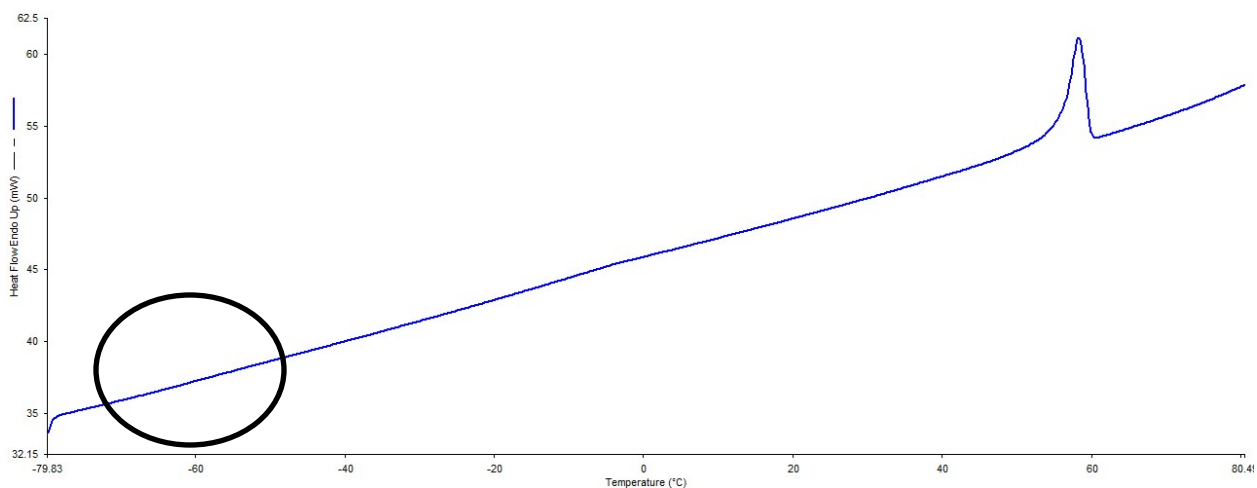

Figure 1: DSC thermogram for neat PCL

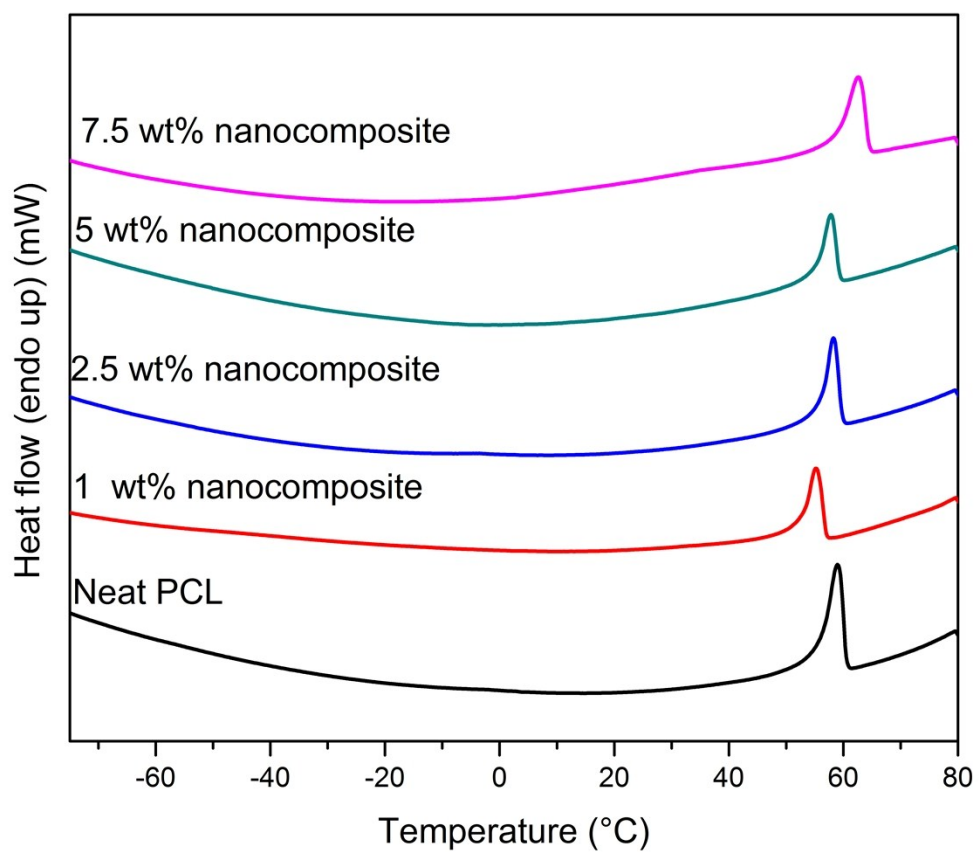

Figure 2: DSC thermogram for neat PCL and PCL-Cloisite 10A nanocomposites

Table 1: Details of the glass transition temperature ( $T_g$ ) for PCL and PCL-Cloisite 10A nanocomposites

| composition | $\Delta T_g$ | $\Delta T_g/2$ | $T_g$ (K) | $\Delta C_p(\text{J}\cdot\text{g}^{-1}\cdot\text{K}^{-1})$ |
|-------------|--------------|----------------|-----------|------------------------------------------------------------|
| 0           | 20           | 10             | 215       | 625                                                        |
| 1           | 21           | 10.5           | 221       | 555                                                        |
| 2.5         | 18           | 9              | 223.7     | 760                                                        |
| 5           | 18           | 9              | 228       | 655                                                        |
| 7.5         | 22           | 11             | 235       | 822                                                        |
